# Supplementary material for: Influence of laser parameters on isotope fractionation and optimisation of lithium and boron isotope ratio measurements using laser ablation-multiple Faraday collector-inductively coupled plasma mass spectrometry
Source: Royal Society of Chemistry journal article supplement (doi:10.1039/c6ja00283h), 2016-01-01
Supplement: c6ja00283h1.pdf [file c6ja00283h1.pdf]

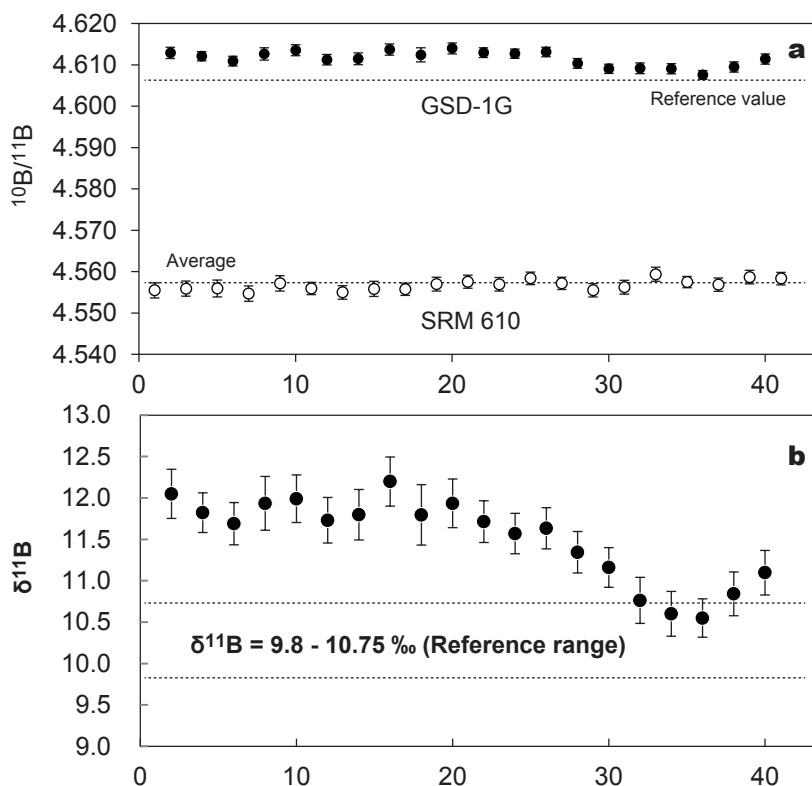

**ESI Figure S1:** Heterogeneity of the GSD-1G glass used for B isotope ratio determination. The raw B isotope ratios are shown for SRM 612 as the bracketing standard and GSD-1G as the bracketed unknown (a). NIST SRM 951 normalised isotope ratios show significant spatial variation compared with the reference analytical results from the bulk GSD-1G sample (b). In contrast, SRM 612 has a fairly uniform composition with deviations within an uncertainty of  $< 0.5\text{‰}$ , indicating its suitability for use as a bracketing standard (see (a)). All errors are 2SD.
