# Supplementary material for: Influence of laser parameters on isotope fractionation and optimisation of lithium and boron isotope ratio measurements using laser ablation-multiple Faraday collector-inductively coupled plasma mass spectrometry
Source: Royal Society of Chemistry journal article supplement (doi:10.1039/c6ja00283h), 2016-01-01
Supplement: c6ja00283h3.pdf [file c6ja00283h3.pdf]

**ESI Table S2.** Analytical results of standard reference materials<sup>a</sup>

| Sample ID        | $\delta^7\text{Li}$ | 2SE  | Sample ID     | $\delta^{11}\text{B}$ | 2SE  |
|------------------|---------------------|------|---------------|-----------------------|------|
| BCR-2G(11)_1     | 2.77                | 1.93 | JB-2(11)_6    | 7.84                  | 0.49 |
| BCR-2G(11)_2     | 8.50                | 1.91 | JB-2(11)_7    | 7.79                  | 0.29 |
| BCR-2G(11)_3     | 7.70                | 1.91 | JB-2(11)_8    | 7.69                  | 0.67 |
| BCR-2G(11)_4     | 5.23                | 1.66 | JB-2(11)_9    | 7.38                  | 0.46 |
| BCR-2G(11)_5     | 7.71                | 1.94 | JB-2(11)_10   | 7.57                  | 0.32 |
| BCR-2G(11-12)_1  | 3.22                | 1.31 | JB-2(11)_11   | 7.54                  | 0.65 |
| BCR-2G(11-12)_2  | 3.40                | 1.37 | JB-2(11)_12   | 8.42                  | 0.86 |
| BCR-2G(11-12)_3  | 3.96                | 1.29 | JB-2(11)_13   | 8.65                  | 0.35 |
| BCR-2G(11-12)_4  | 4.58                | 1.21 | JB-2(11)_14   | 9.28                  | 0.88 |
| BCR-2G(11-12)_5  | 5.61                | 1.18 | JB-2_1        | 7.95                  | 1.26 |
| BCR-2G(11-12)_6  | 1.53                | 1.43 | JB-2_2        | 9.56                  | 1.74 |
| BCR-2G(11-12)_7  | 0.46                | 1.30 | JB-2_3        | 7.64                  | 1.11 |
| BCR-2G(11-12)_8  | 2.78                | 1.32 | JB-2_4        | 9.27                  | 1.02 |
| BCR-2G(11-12)_9  | 0.31                | 1.29 | JB-2_5        | 7.98                  | 1.04 |
| BCR-2G(11-12)_10 | 3.19                | 1.32 | JB-2(11)_1    | 4.78                  | 2.86 |
| BCR-2G(11-12)_11 | 3.03                | 1.40 | JB-2(11)_2    | 7.73                  | 0.81 |
| BCR-2G(11-12)_12 | 5.93                | 1.05 | JB-2(11)_3    | 7.96                  | 0.60 |
| BCR-2G(11-12)_13 | 3.37                | 1.15 | JB-2(11)_4    | 8.81                  | 0.48 |
| Average          | 4.07                | 4.70 | JB-2(11)_5    | 8.32                  | 0.65 |
| BCR-2G(Ref)      | 3.48                | 1.71 | JB-2(11)_6    | 6.87                  | 1.46 |
|                  |                     |      | JB-2(11)_7    | 8.93                  | 1.12 |
| BHVO-2G_1        | 7.24                | 2.34 | JB-2(11)_8    | 6.54                  | 0.75 |
| BHVO-2G_2        | 10.85               | 2.34 | JB-2(11)_9    | 8.32                  | 0.63 |
| BHVO-2G_3        | 4.88                | 1.89 | JB-2(11)_10   | 6.67                  | 0.92 |
| BHVO-2G_4        | 8.65                | 2.36 | Average       | 7.90                  | 2.06 |
| BHVO-2G_5        | 6.08                | 2.11 | JB-2(Ref)     | 7.24                  | 0.33 |
| Average          | 7.54                | 4.64 |               |                       |      |
| BHVO-2G(Ref)     | 5.90                | 5.66 | BCR-2G(11)_1  | -2.09                 | 1.36 |
|                  |                     |      | BCR-2G(11)_2  | -3.11                 | 2.31 |
| JB-3(11)_1       | 8.22                | 2.27 | BCR-2G(11)_3  | -3.66                 | 2.17 |
| JB-3(11)_2       | 7.87                | 1.55 | BCR-2G(11)_4  | -4.86                 | 2.69 |
| JB-3(11)_3       | -1.24               | 1.04 | BCR-2G(11)_5  | -3.91                 | 2.99 |
| JB-3(11)_4       | -0.66               | 0.79 | BCR-2G(11)_6  | -6.06                 | 1.55 |
| JB-3(11)_5       | 5.63                | 2.01 | BCR-2G(11)_7  | -3.70                 | 1.57 |
| Average          | 3.96                | 9.20 | BCR-2G(11)_8  | -3.13                 | 1.71 |
| JB-3(Ref)        | 3.94                | 1.00 | BCR-2G(11)_9  | -2.32                 | 1.15 |
|                  |                     |      | BCR-2G(11)_10 | -5.45                 | 1.67 |
| GSD-1G_1         | 33.22               | 0.61 | Average       | -3.83                 | 2.58 |
| GSD-1G_2         | 34.00               | 0.93 | BCR-2G(Ref)   | N/A                   | N/A  |
| GSD-1G_3         | 33.56               | 0.74 |               |                       |      |
| GSD-1G_4         | 34.21               | 0.71 | GSD-1G_1      | 11.22                 | 0.48 |
| GSD-1G_5         | 32.90               | 0.72 | GSD-1G_2      | 9.82                  | 0.48 |
| GSD-1G_3         | 27.18               | 0.84 | GSD-1G_3      | 10.28                 | 0.36 |
| GSD-1G_8         | 27.04               | 0.65 | GSD-1G_4      | 10.21                 | 0.42 |
| GSD-1G_4         | 28.63               | 0.67 | GSD-1G_5      | 9.49                  | 0.44 |
| GSD-1G_5         | 28.94               | 0.52 | GSD-1G_6      | 9.04                  | 0.46 |
| GSD-1G_1         | 27.54               | 0.55 | GSD-1G_7      | 10.31                 | 0.42 |
| GSD-1G_2         | 28.21               | 0.59 | GSD-1G_8      | 10.91                 | 0.34 |
| GSD-1G_3         | 27.60               | 0.58 | GSD-1G_9      | 11.53                 | 0.40 |
| GSD-1G_4         | 26.25               | 0.66 | GSD-1G_10     | 12.13                 | 0.45 |
| GSD-1G_5         | 27.18               | 0.59 | Average       | 10.49                 | 1.91 |
| GSD-1G_6         | 28.09               | 0.56 | GSD-1G(Ref)   | 10.27                 | 1.33 |
| GSD-1G_7         | 28.81               | 0.52 |               |                       |      |
| GSD-1G_8         | 27.20               | 0.54 | SRM610(11)_1  | -0.19                 | 0.13 |
| GSD-1G_9         | 27.13               | 0.67 | SRM610(11)_2  | -0.29                 | 0.12 |
| GSD-1G_10        | 26.35               | 0.63 | SRM610(11)_3  | -0.22                 | 0.16 |
| Average          | 29.16               | 5.64 | SRM610(11)_4  | -0.41                 | 0.16 |
| GSD-1G(Ref)      | 30.95               | 2.26 | SRM610(11)_5  | -0.52                 | 0.14 |
|                  |                     |      | Average       | -0.33                 | 0.28 |
| SRM610(11-12)_1  | 31.88               | 0.85 | SRM610(Ref)   | -0.52                 | 0.53 |
| SRM610(11-12)_2  | 31.20               | 0.78 |               |                       |      |
| SRM610(11-12)_3  | 30.97               | 0.81 |               |                       |      |
| Average          | 31.35               | 0.94 |               |                       |      |
| SRM610(Ref)      | 32.50               | 1.50 |               |                       |      |

<sup>a</sup>: Ref: reference values from Brand et al. (2014), N/A: not available, 2SE: 2-standard error. Averages are given in 2-standard deviation.
