# Supplementary material for: Influence of laser parameters on isotope fractionation and optimisation of lithium and boron isotope ratio measurements using laser ablation-multiple Faraday collector-inductively coupled plasma mass spectrometry
Source: Royal Society of Chemistry journal article supplement (doi:10.1039/c6ja00283h), 2016-01-01
Supplement: c6ja00283h6.pdf [file c6ja00283h6.pdf]

ESI Table S5. Analytical results for jadeite using crater volume-corrected LA-MFC-ICPMS<sup>a</sup>

| Run #                | Ablation condition        | Sample    | Crat. vol. (µm <sup>3</sup> ) | Li (ppm)    | 2SE (ppm)  | <sup>6</sup> Li / V | 2SE    | <sup>7</sup> Li / V | 2SE    | <sup>7</sup> Li/ <sup>6</sup> Li | 2SE   | δ <sup>7</sup> Li | δ <sup>7</sup> Li (vcv) | 2SE        |
|----------------------|---------------------------|-----------|-------------------------------|-------------|------------|---------------------|--------|---------------------|--------|----------------------------------|-------|-------------------|-------------------------|------------|
| Run1                 | 100um/10Hz/193nm (150 mJ) | SRM612_1  | 549779                        | <b>40.2</b> |            | 0.0930              | 0.0026 | 1.4654              | 0.0405 | 15.750                           | 0.010 | <b>31.20</b>      |                         | 0.65       |
| Run2                 | 100um/10Hz/193nm (150 mJ) | Jade-0    | 290597                        | 20.2        | 0.9        | 0.0261              | 0.0012 | 0.3981              | 0.0180 | 15.276                           | 0.018 | 1.00              | 0.65                    | 1.15       |
| Run3                 | 100um/10Hz/193nm (150 mJ) | SRM612_2  | 549779                        |             |            | 0.0976              | 0.0021 | 1.5369              | 0.0335 | 15.753                           | 0.014 |                   |                         | 0.86       |
| Run4                 | 100um/10Hz/193nm (150 mJ) | Jade-1    | 290597                        | 28.3        | 0.7        | 0.0373              | 0.0009 | 0.5690              | 0.0133 | 15.271                           | 0.010 | 0.05              | -0.30                   | 0.62       |
| Run5                 | 100um/10Hz/193nm (150 mJ) | SRM612_3  | 549779                        |             |            | 0.0968              | 0.0025 | 1.5262              | 0.0393 | 15.770                           | 0.009 |                   |                         | 0.58       |
| Run6                 | 100um/10Hz/193nm (150 mJ) | Jade-2    | 290597                        | 39.4        | 1.6        | 0.0515              | 0.0021 | 0.7848              | 0.0314 | 15.251                           | 0.010 | -0.76             | -1.11                   | 0.64       |
| Run7                 | 100um/10Hz/193nm (150 mJ) | SRM612_4  | 549779                        |             |            | 0.0954              | 0.0019 | 1.5021              | 0.0307 | 15.738                           | 0.010 |                   |                         | 0.66       |
| Run8                 | 100um/10Hz/193nm (150 mJ) | Jade-3    | 290597                        | 21.6        | 1.0        | 0.0286              | 0.0013 | 0.4355              | 0.0202 | 15.226                           | 0.012 | -0.63             | -0.98                   | 0.82       |
| Run9                 | 100um/10Hz/193nm (150 mJ) | SRM612_5  | 549779                        |             |            | 0.0996              | 0.0011 | 1.5651              | 0.0174 | 15.715                           | 0.011 |                   |                         | 0.70       |
| Run10                | 100um/10Hz/193nm (150 mJ) | Jade-4    | 290597                        | 10.4        | 0.4        | 0.0140              | 0.0005 | 0.2125              | 0.0075 | 15.153                           | 0.019 | -5.53             | -5.88                   | 1.27       |
| Run11                | 100um/10Hz/193nm (150 mJ) | SRM612_6  | 549779                        |             |            | 0.0972              | 0.0009 | 1.5305              | 0.0138 | 15.746                           | 0.010 |                   |                         | 0.65       |
| Run12                | 100um/10Hz/193nm (150 mJ) | Jade-5    | 290597                        | 11.2        | 0.4        | 0.0148              | 0.0006 | 0.2237              | 0.0088 | 15.134                           | 0.019 | -8.35             | -8.70                   | 1.27       |
| Run13                | 100um/10Hz/193nm (150 mJ) | SRM612_7  | 549779                        |             |            | 0.0950              | 0.0008 | 1.4980              | 0.0132 | 15.769                           | 0.011 |                   |                         | 0.68       |
| Run14                | 100um/10Hz/193nm (150 mJ) | Jade-6    | 290597                        | 21.0        | 0.9        | 0.0264              | 0.0011 | 0.4030              | 0.0177 | 15.252                           | 0.017 | -1.88             | -2.23                   | 1.09       |
| Run15                | 100um/10Hz/193nm (150 mJ) | SRM612_8  | 549779                        |             |            | 0.0900              | 0.0009 | 1.4205              | 0.0144 | 15.779                           | 0.012 |                   |                         | 0.74       |
| Run16                | 100um/10Hz/193nm (150 mJ) | Jade-7    | 290597                        | 9.3         | 0.4        | 0.0114              | 0.0004 | 0.1721              | 0.0067 | 15.132                           | 0.031 | -9.57             | -9.92                   | 2.02       |
| Run17                | 100um/10Hz/193nm (150 mJ) | SRM612_9  | 549779                        |             |            | 0.0892              | 0.0009 | 1.4068              | 0.0146 | 15.772                           | 0.010 |                   |                         | 0.64       |
| Run18                | 100um/10Hz/193nm (150 mJ) | Jade-8    | 290597                        | 16.2        | 0.9        | 0.0196              | 0.0010 | 0.2978              | 0.0159 | 15.213                           | 0.020 | -4.05             | -4.40                   | 1.29       |
| Run19                | 100um/10Hz/193nm (150 mJ) | SRM612_10 | 549779                        |             |            | 0.0883              | 0.0011 | 1.3918              | 0.0169 | 15.766                           | 0.010 |                   |                         | 0.61       |
| Run20                | 100um/10Hz/193nm (150 mJ) | Jade-9    | 290597                        | 17.3        | 0.8        | 0.0208              | 0.0009 | 0.3162              | 0.0145 | 15.209                           | 0.019 | -4.09             | -4.44                   | 1.25       |
| Run21                | 100um/10Hz/193nm (150 mJ) | SRM612_11 | 549779                        |             |            | 0.0885              | 0.0008 | 1.3953              | 0.0135 | 15.765                           | 0.008 |                   |                         | 0.52       |
| Run22                | 100um/10Hz/193nm (150 mJ) | Jade-10   | 290597                        | 10.9        | 0.7        | 0.0136              | 0.0008 | 0.2060              | 0.0123 | 15.182                           | 0.028 | -4.69             | -5.04                   | 1.84       |
| Run23                | 100um/10Hz/193nm (150 mJ) | SRM612_12 | 549779                        |             |            | 0.0934              | 0.0014 | 1.4685              | 0.0230 | 15.728                           | 0.011 |                   |                         | 0.68       |
| Run24                | 100um/10Hz/193nm (150 mJ) | Jade-11   | 290597                        | 11.4        | 0.7        | 0.0145              | 0.0009 | 0.2206              | 0.0136 | 15.164                           | 0.029 | -5.28             | -5.63                   | 1.90       |
| Run25                | 100um/10Hz/193nm (150 mJ) | SRM612_13 | 549779                        |             |            | 0.0937              | 0.0015 | 1.4759              | 0.0232 | 15.749                           | 0.007 |                   |                         | 0.46       |
| Run26                | 100um/10Hz/193nm (150 mJ) | Jade-12   | 290597                        | 13.5        | 0.4        | 0.0173              | 0.0006 | 0.2624              | 0.0085 | 15.209                           | 0.019 | -2.84             | -3.19                   | 1.25       |
| Run27                | 100um/10Hz/193nm (150 mJ) | SRM612_14 | 549779                        |             |            | 0.0947              | 0.0015 | 1.4904              | 0.0238 | 15.742                           | 0.012 |                   |                         | 0.79       |
| Run28                | 100um/10Hz/193nm (150 mJ) | Jade-13   | 290597                        | 12.5        | 0.6        | 0.0159              | 0.0008 | 0.2415              | 0.0124 | 15.183                           | 0.022 | -3.76             | -4.11                   | 1.43       |
| Run29                | 100um/10Hz/193nm (150 mJ) | SRM612_15 | 549779                        |             |            | 0.0916              | 0.0018 | 1.4408              | 0.0280 | 15.723                           | 0.010 |                   |                         | 0.62       |
| Run30                | 100um/10Hz/193nm (150 mJ) | Jade-14   | 290597                        | 12.5        | 0.4        | 0.0162              | 0.0005 | 0.2443              | 0.0074 | 15.121                           | 0.017 | -7.35             | -7.70                   | 1.10       |
| Run31                | 100um/10Hz/193nm (150 mJ) | SRM612_16 | 549779                        |             |            | 0.0982              | 0.0022 | 1.5441              | 0.0341 | 15.731                           | 0.007 |                   |                         | 0.44       |
| <b>Average / 1SD</b> |                           |           |                               | <b>17.0</b> | <b>8.2</b> |                     |        |                     |        | <b>Average / 2SD</b>             |       |                   | <b>-4.2</b>             | <b>6.2</b> |
| Run #                | Ablation condition        | Sample    | Crat. vol. (µm <sup>3</sup> ) | Li (ppm)    | 2SE (ppm)  | <sup>6</sup> Li / V | 2SE    | <sup>7</sup> Li / V | 2SE    | <sup>7</sup> Li/ <sup>6</sup> Li | 2SE   | δ <sup>7</sup> Li |                         | 2SE        |
| Run31                | 100um/10Hz/193nm (150 mJ) | SRM612_16 | 549779                        | <b>40.2</b> |            | 0.0982              | 0.0022 | 1.5441              | 0.0341 | 15.731                           | 0.007 | <b>31.20</b>      |                         | 0.44       |
| Run32                | 100um/5Hz/193nm (150 mJ)  | SRM612_17 | 314159                        | 39.5        | 1.1        | 0.0552              | 0.0016 | 0.8679              | 0.0247 | 15.726                           | 0.009 | 30.88             |                         | 0.55       |
| Run31                | 100um/10Hz/193nm (150 mJ) | SRM612_16 | 549779                        |             |            | 0.0982              | 0.0022 | 1.5441              | 0.0341 | 15.731                           | 0.007 |                   |                         | 0.44       |
| Run34                | 100um/15Hz/193nm (150 mJ) | SRM612_18 | 785398                        | 39.7        | 0.9        | 0.1384              | 0.0030 | 2.1759              | 0.0481 | 15.718                           | 0.009 | 30.41             |                         | 0.60       |
| Run31                | 100um/10Hz/193nm (150 mJ) | SRM612_16 | 549779                        |             |            | 0.0982              | 0.0022 | 1.5441              | 0.0341 | 15.731                           | 0.007 |                   |                         | 0.44       |
| Run36                | 100um/20Hz/193nm (150 mJ) | SRM612_19 | 1044580                       | 37.8        | 0.7        | 0.1756              | 0.0031 | 2.7576              | 0.0486 | 15.705                           | 0.008 | 29.57             |                         | 0.52       |
| Run31                | 100um/10Hz/193nm (150 mJ) | SRM612_16 | 549779                        |             |            | 0.0982              | 0.0022 | 1.5441              | 0.0341 | 15.731                           | 0.007 |                   |                         | 0.44       |

<sup>a</sup>: 2SE: 2-standard error, volume: µm<sup>3</sup>, depth µm; Crat. Vol.: crater volume; vcv: volume-corrected value. Run 31 to 36 were used for crater volume correction calculations
